# Supplementary material
Source: PubMed Central journal article supplement (PMC7573798)
Supplement: jamaneurol-e203536-s002.pdf [file jamaneurol-e203536-s002.pdf]

## Supplemental Online Content: Nonauthor Collaborators

\* Indicates required information. Only first name, last name, and suffix will appear in PubMed.

| <b>Group Name:* Alzheimer's Disease Genetics Consortium (ADGC)</b> |            |         |                  |                                                        |                                          |                                                         |                                  |
|--------------------------------------------------------------------|------------|---------|------------------|--------------------------------------------------------|------------------------------------------|---------------------------------------------------------|----------------------------------|
| First Name, Middle Initial*                                        | Last Name* | Suffix* | Academic Degrees | Institution                                            | Location (city, state/province, country) | Role or Contribution, eg, chair, principal investigator | Subgroup, eg, Steering Committee |
| Erin                                                               | Abner      |         | PhD              | University of Kentucky                                 | Lexington, Kentucky, USA                 |                                                         |                                  |
| Perrie, M.                                                         | Adams      |         | PhD              | University of Texas Southwestern Medical Center        | Dallas, Texas, USA                       |                                                         |                                  |
| Roger, L.                                                          | Albin      |         | MD               | University of Michigan                                 | Ann Arbor, Michigan, USA                 |                                                         |                                  |
| Liana, G.                                                          | Apostolova |         | MD               | Indiana University                                     | Indianapolis, Indiana, USA               |                                                         |                                  |
| Steven, E.                                                         | Arnold     |         | MD               | University of Pennsylvania Perelman School of Medicine | Philadelphia, Pennsylvania, USA          |                                                         |                                  |
| Craig, S.                                                          | Atwood     |         | PhD              | University of Wisconsin                                | Madison, Wisconsin, USA                  |                                                         |                                  |
| Clinton, T.                                                        | Baldwin    |         | PhD              | Boston University                                      | Boston, Massachusetts, USA               |                                                         |                                  |
| Robert, C.                                                         | Barber     |         | PhD              | University of North Texas Health Science Center        | Fort Worth, Texas, USA                   |                                                         |                                  |
| Sandra                                                             | Barral     |         | PhD              | Columbia University                                    | New York, New York, USA                  |                                                         |                                  |
| Thomas, G.                                                         | Beach      |         | MD PhD           | Banner Sun Health Research Institute                   | Phoenix, Arizona, USA                    |                                                         |                                  |
| James, T.                                                          | Becker     |         | PhD              | University of Pittsburgh School of Medicine            | Pittsburgh, Pennsylvania, USA            |                                                         |                                  |
| Gary, W.                                                           | Beecham    |         | PhD              | University of Miami                                    | Miami, Florida, USA                      |                                                         |                                  |
| Eileen, H.                                                         | Bigio      |         | MD               | Northwestern University Feinberg School of Medicine    | Chicago, Illinois, USA                   |                                                         |                                  |
| Thomas, D.                                                         | Bird       |         | MD               | University of Washington                               | Seattle, Washington, USA                 |                                                         |                                  |

## Supplemental Online Content: Nonauthor Collaborators

\* Indicates required information. Only first name, last name, and suffix will appear in PubMed.

| First Name, Middle Initial* | Last Name*   | Suffix* | Academic Degrees | Institution                              | Location (city, state/province, country) | Role or Contribution, eg, chair, principal investigator | Subgroup, eg, Steering Committee |
|-----------------------------|--------------|---------|------------------|------------------------------------------|------------------------------------------|---------------------------------------------------------|----------------------------------|
| Deborah                     | Blacker      |         | MD               | Harvard School of Public Health          | Boston, Massachusetts, USA               |                                                         |                                  |
| Bradley, F.                 | Boeve        |         | MD               | Mayo Clinic                              | Rochester, Minnesota, USA                |                                                         |                                  |
| James, D.                   | Bowen        |         | MD               | Swedish Medical Center                   | Seattle, Washington, USA                 |                                                         |                                  |
| Adam                        | Boxer        |         | MD PhD           | University of California San Francisco   | San Francisco, California, USA           |                                                         |                                  |
| James, R.                   | Burke        |         | MD PhD           | Duke University                          | Durham, North Carolina, USA              |                                                         |                                  |
| Jeffrey, M.                 | Burns        |         | MD MS            | University of Kansas Medical Center      | Kansas City, Kansas, USA                 |                                                         |                                  |
| Nigel, J.                   | Cairns       |         | PhD<br>FRCPath   | Washington University                    | St. Louis, Missouri, USA                 |                                                         |                                  |
| Chuanhai                    | Cao          |         | PhD              | University of South Florida              | Tampa, Florida, USA                      |                                                         |                                  |
| Cynthia, M.                 | Carlsson     |         | MD               | University of Wisconsin                  | Madison, Wisconsin, USA                  |                                                         |                                  |
| Regina, M.                  | Carney       |         | MD               | University of Miami                      | Miami, Florida, USA                      |                                                         |                                  |
| Minerva, M.                 | Carrasquillo |         | PhD              | Mayo Clinic                              | Jacksonville, Florida, USA               |                                                         |                                  |
| David, H.                   | Cribbs       |         | PhD              | University of California Irvine          | Irvine, California, USA                  |                                                         |                                  |
| Carlos                      | Cruchaga     |         | PhD              | Washington University School of Medicine | St. Louis, Missouri, USA                 |                                                         |                                  |
| Malcom                      | Dick         |         | PhD              | University of California Irvine          | Irvine, California, USA                  |                                                         |                                  |
| Dennis, W.                  | Dickson      |         | MD               | Mayo Clinic                              | Jacksonville, Florida, USA               |                                                         |                                  |
| Rachelle S.                 | Doody        |         | MD PhD           | Baylor College of Medicine               | Houston, Texas, USA                      |                                                         |                                  |
| Ranjan                      | Duara        |         | MD               | Mount Sinai Medical Center               | Miami Beach, Florida, USA                |                                                         |                                  |

## Supplemental Online Content: Nonauthor Collaborators

\* Indicates required information. Only first name, last name, and suffix will appear in PubMed.

| First Name, Middle Initial* | Last Name* | Suffix* | Academic Degrees | Institution                                                                            | Location (city, state/province, country) | Role or Contribution, eg, chair, principal investigator | Subgroup, eg, Steering Committee |
|-----------------------------|------------|---------|------------------|----------------------------------------------------------------------------------------|------------------------------------------|---------------------------------------------------------|----------------------------------|
| Kelley, M.                  | Faber      |         | MS               | Indiana University                                                                     | Indianapolis, Indiana, USA               |                                                         |                                  |
| Thomas, J.                  | Fairchild  |         | PhD              | University of North Texas Health Science Center                                        | Fort Worth, Texas, USA                   |                                                         |                                  |
| Kenneth, B.                 | Fallon     |         | MD               | University of Alabama at Birmingham                                                    | Birmingham, Alabama, USA                 |                                                         |                                  |
| David, W.                   | Fardo      |         | PhD              | University of Kentucky                                                                 | Lexington, Kentucky, USA                 |                                                         |                                  |
| Martin, R.                  | Farlow     |         | MD               | Indiana University                                                                     | Indianapolis, Indiana, USA               |                                                         |                                  |
| Steven                      | Ferris     |         | PhD              | New York University                                                                    | New York, New York, USA                  |                                                         |                                  |
| Matthew, P.                 | Frosch     |         | MD PhD           | Massachusetts General Hospital                                                         | Boston, Massachusetts, USA               |                                                         |                                  |
| Douglas, R.                 | Galasko    |         | MD               | University of California San Diego                                                     | San Diego, California, USA               |                                                         |                                  |
| Marla                       | Gearing    |         | PhD              | Emory University                                                                       | Atlanta, Georgia, USA                    |                                                         |                                  |
| Daniel, H.                  | Geschwind  |         | MD PhD           | University of California Los Angeles                                                   | Los Angeles, California, USA             |                                                         |                                  |
| Bernardino                  | Ghetti     |         | MD               | Indiana University                                                                     | Indianapolis, Indiana, USA               |                                                         |                                  |
| John, R.                    | Gilbert    |         | PhD              | University of Miami                                                                    | Miami, Florida, USA                      |                                                         |                                  |
| Robert, C.                  | Green      |         | MD MPH           | Massachusetts General Hospital/Brigham and Women's Hospital and Harvard Medical School | Boston, Massachusetts, USA               |                                                         |                                  |
| John, H.                    | Growdon    |         | MD               | Massachusetts General Hospital/Harvard Medical School                                  | Boston, Massachusetts, USA               |                                                         |                                  |
| Hakon                       | Hakonarson |         | MD PhD           | Children's Hospital of Philadelphia                                                    | Philadelphia, Pennsylvania, USA          |                                                         |                                  |

Supplemental Online Content: Nonauthor Collaborators

\* Indicates required information. Only first name, last name, and suffix will appear in PubMed.

| First Name, Middle Initial* | Last Name* | Suffix* | Academic Degrees | Institution                                     | Location (city, state/province, country) | Role or Contribution, eg, chair, principal investigator | Subgroup, eg, Steering Committee |
|-----------------------------|------------|---------|------------------|-------------------------------------------------|------------------------------------------|---------------------------------------------------------|----------------------------------|
| Ronald, L.                  | Hamilton   |         | MD               | University of Pittsburgh                        | Pittsburgh, Pennsylvania, USA            |                                                         |                                  |
| John                        | Hardy      |         | PhD              | University College London                       | Queens Square, London, , UK              |                                                         |                                  |
| Lindy, E.                   | Harrell    |         | MD PhD           | University of Alabama at Birmingham             | Birmingham, Alabama, USA                 |                                                         |                                  |
| Lawrence, S.                | Honig      |         | MD PhD           | Columbia University                             | New York, New York, USA                  |                                                         |                                  |
| Ryan, M.                    | Huebinger  |         | PhD              | University of Texas Southwestern Medical Center | Dallas, Texas, USA                       |                                                         |                                  |
| Matthew, J.                 | Huentelman |         | PhD              | Translational Genomics Research Institute       | Phoenix, Arizona, USA                    |                                                         |                                  |
| Christine, M.               | Hulette    |         | MD               | Duke University                                 | Durham, North Carolina, USA              |                                                         |                                  |
| Gail, P.                    | Jarvik     |         | MD PhD           | University of Washington                        | Seattle, Washington, USA                 |                                                         |                                  |
| Lee-Way                     | Jin        |         | MD PhD           | University of California Davis                  | Sacramento, California, USA              |                                                         |                                  |
| Anna                        | Karydas    |         | BA               | University of California San Francisco          | San Francisco, California, USA           |                                                         |                                  |
| Mindy, J.                   | Katz       |         | MPH              | Albert Einstein College of Medicine             | New York, New York, USA                  |                                                         |                                  |
| John, S.K.                  | Kauwe      |         | PhD              | Brigham Young University                        | Provo, Utah, USA                         |                                                         |                                  |
| C. Dirk                     | Keene      |         | MD PhD           | University of Washington                        | Seattle, Washington, USA                 |                                                         |                                  |
| Ronald                      | Kim        |         | MD               | University of California Irvine                 | Irvine, California, USA                  |                                                         |                                  |
| Joel, H.                    | Kramer     |         | PsyD             | University of California San Francisco          | San Francisco, California, USA           |                                                         |                                  |
| James, J.                   | Lah        |         | MD PhD           | Emory University                                | Atlanta, Georgia, USA                    |                                                         |                                  |

## Supplemental Online Content: Nonauthor Collaborators

\* Indicates required information. Only first name, last name, and suffix will appear in PubMed.

| First Name, Middle Initial* | Last Name* | Suffix* | Academic Degrees | Institution                                                            | Location (city, state/province, country) | Role or Contribution, eg, chair, principal investigator | Subgroup, eg, Steering Committee |
|-----------------------------|------------|---------|------------------|------------------------------------------------------------------------|------------------------------------------|---------------------------------------------------------|----------------------------------|
| Yuk Ye                      | Leung      |         | PhD              | University of Pennsylvania<br>Perelman School of Medicine              | Philadelphia,<br>Pennsylvania, USA       |                                                         |                                  |
| Ge                          | Li         |         | MD PhD           | University of Washington/VA<br>Puget Sound Health Care<br>System/GRECC | Seattle, Washington, USA                 |                                                         |                                  |
| Andrew, P.                  | Lieberman  |         | MD PhD           | University of Michigan                                                 | Ann Arbor, Michigan, USA                 |                                                         |                                  |
| Richard, B.                 | Lipton     |         | MD               | Albert Einstein College of<br>Medicine                                 | New York, New York, USA                  |                                                         |                                  |
| Constantine, G.             | Lyketsos   |         | MD MHS           | Johns Hopkins University                                               | Baltimore, Maryland, USA                 |                                                         |                                  |
| John                        | Malamon    |         | MSE              | University of Pennsylvania<br>Perelman School of Medicine              | Philadelphia,<br>Pennsylvania, USA       |                                                         |                                  |
| Daniel, C.                  | Marson     |         | JD PhD           | University of Alabama at<br>Birmingham                                 | Birmingham, Alabama,<br>USA              |                                                         |                                  |
| Frank                       | Martiniuk  |         | PhD              | University of Miami                                                    | Miami, Florida, USA                      |                                                         |                                  |
| Eliezer                     | Masliah    |         | MD               | University of California San<br>Diego                                  | San Diego, California, USA               |                                                         |                                  |
| Wayne, C.                   | McCormick  |         | MD MPH           | University of Washington                                               | Seattle, Washington, USA                 |                                                         |                                  |
| Susan, M.                   | McCurry    |         | PhD              | University of Washington                                               | Seattle, Washington, USA                 |                                                         |                                  |
| Andrew, N.                  | McDavid    |         | BA               | Fred Hutchinson Cancer<br>Research Center                              | Seattle, Washington, USA                 |                                                         |                                  |
| Stefan                      | McDonough  |         | PhD              | Pfizer Worldwide Research and<br>Development                           | Cambridge,<br>Massachusetts, USA         |                                                         |                                  |
| Ann, C.                     | McKee      |         | MD               | Boston University                                                      | Boston, Massachusetts,<br>USA            |                                                         |                                  |

## Supplemental Online Content: Nonauthor Collaborators

\* Indicates required information. Only first name, last name, and suffix will appear in PubMed.

| First Name, Middle Initial* | Last Name* | Suffix* | Academic Degrees | Institution                                                              | Location (city, state/province, country) | Role or Contribution, eg, chair, principal investigator | Subgroup, eg, Steering Committee |
|-----------------------------|------------|---------|------------------|--------------------------------------------------------------------------|------------------------------------------|---------------------------------------------------------|----------------------------------|
| Marsel                      | Mesulam    |         | MD               | Northwestern University<br>Feinberg School of Medicine                   | Chicago, Illinois, USA                   |                                                         |                                  |
| Bruce, L.                   | Miller     |         | MD               | University of California San Francisco                                   | San Francisco, California, USA           |                                                         |                                  |
| Carol, A.                   | Miller     |         | MD               | University of Southern California                                        | Los Angeles, California, USA             |                                                         |                                  |
| Thomas, J.                  | Montine    |         | MD PhD           | Stanford University                                                      | Stanford, California, USA                |                                                         |                                  |
| Shubhabrata                 | Mukherjee  |         | PhD              | University of Washington                                                 | Seattle, Washington, USA                 |                                                         |                                  |
| Amanda, J.                  | Myers      |         | PhD              | University of Miami                                                      | Miami, Florida, USA                      |                                                         |                                  |
| Sid, E.                     | O'Bryant   |         | PhD              | University of North Texas Health Science Center                          | Fort Worth, Texas, USA                   |                                                         |                                  |
| John, M.                    | Olichney   |         | MD               | University of California Davis                                           | Sacramento, California, USA              |                                                         |                                  |
| Joseph, E.                  | Parisi     |         | MD               | Mayo Clinic                                                              | Rochester, Minnesota, USA                |                                                         |                                  |
| Elaine                      | Peskind    |         | MD               | University of Washington School of Medicine                              | Seattle, Washington, USA                 |                                                         |                                  |
| Aimee                       | Pierce     |         | MD               | University of California Irvine                                          | Irvine, California, USA                  |                                                         |                                  |
| Wayne, W.                   | Poon       |         | PhD              | University of California Irvine                                          | Irvine, California, USA                  |                                                         |                                  |
| Huntington                  | Potter     |         | PhD              | Massachusetts General Hospital/University of Colorado School of Medicine | Boston, Massachusetts, USA               |                                                         |                                  |
| Liming                      | Qu         |         | MS               | University of Pennsylvania Perelman School of Medicine                   | Philadelphia, Pennsylvania, USA          |                                                         |                                  |
| Joseph, F.                  | Quinn      |         | MD               | Oregon Health & Science University                                       | Portland, Oregon, USA                    |                                                         |                                  |

Supplemental Online Content: Nonauthor Collaborators

\* Indicates required information. Only first name, last name, and suffix will appear in PubMed.

| First Name, Middle Initial* | Last Name* | Suffix* | Academic Degrees | Institution                                                                                                                                | Location (city, state/province, country) | Role or Contribution, eg, chair, principal investigator | Subgroup, eg, Steering Committee |
|-----------------------------|------------|---------|------------------|--------------------------------------------------------------------------------------------------------------------------------------------|------------------------------------------|---------------------------------------------------------|----------------------------------|
| Ashok                       | Raj        |         | MD               | University of South Florida                                                                                                                | Tampa, Florida, USA                      |                                                         |                                  |
| Murray                      | Raskind    |         | MD               | University of Washington School of Medicine                                                                                                | Seattle, Washington, USA                 |                                                         |                                  |
| Barry                       | Reisberg   |         | MD               | New York University                                                                                                                        | New York, New York, USA                  |                                                         |                                  |
| Joan, S.                    | Reisch     |         | PhD              | University of Texas Southwestern Medical Center                                                                                            | Dallas, Texas, USA                       |                                                         |                                  |
| John, M.                    | Ringman    |         | MD               | University of Southern California                                                                                                          | Los Angeles, California, USA             |                                                         |                                  |
| Erik, D.                    | Roberson   |         | MD PhD           | University of Alabama at Birmingham                                                                                                        | Birmingham, Alabama, USA                 |                                                         |                                  |
| Ekaterina                   | Rogaeva    |         | PhD              | University of Toronto                                                                                                                      | Toronto, Ontario, Canada                 |                                                         |                                  |
| Howard, J.                  | Rosen      |         | MD               | University of California San Francisco                                                                                                     | San Francisco, California, USA           |                                                         |                                  |
| Donald, R.                  | Royall     |         | MD               | South Texas Veterans Health Administration Geriatric Research Education & Clinical Center (GRECC), UT Health Science Center at San Antonio | San Antonio, Texas, USA                  |                                                         |                                  |
| Mark, A.                    | Sager      |         | MD               | University of Wisconsin                                                                                                                    | Madison, Wisconsin, USA                  |                                                         |                                  |
| Julie, A.                   | Schneider  |         | MD               | Rush University Medical Center                                                                                                             | Chicago, Illinois, USA                   |                                                         |                                  |
| Lon, S.                     | Schneider  |         | MD               | University of Southern California                                                                                                          | Los Angeles, California, USA             |                                                         |                                  |
| William, W.                 | Seeley     |         | MD               | University of California San Francisco                                                                                                     | San Francisco, California, USA           |                                                         |                                  |

Supplemental Online Content: Nonauthor Collaborators

\* Indicates required information. Only first name, last name, and suffix will appear in PubMed.

| First Name, Middle Initial* | Last Name*       | Suffix* | Academic Degrees | Institution                                                      | Location (city, state/province, country) | Role or Contribution, eg, chair, principal investigator | Subgroup, eg, Steering Committee |
|-----------------------------|------------------|---------|------------------|------------------------------------------------------------------|------------------------------------------|---------------------------------------------------------|----------------------------------|
| Scott                       | Small            |         | MD               | Columbia University                                              | New York, New York, USA                  |                                                         |                                  |
| Joshua, A.                  | Sonnen           |         | MD               | University of Washington                                         | Seattle, Washington, USA                 |                                                         |                                  |
| Salvatore                   | Spina            |         | MD               | Indiana University                                               | Indianapolis, Indiana, USA               |                                                         |                                  |
| Peter                       | St George-Hyslop |         | MD FRCP          | University of Toronto                                            | Toronto, Ontario, Canada                 |                                                         |                                  |
| Robert, A.                  | Stern            |         | PhD              | Boston University                                                | Boston, Massachusetts, USA               |                                                         |                                  |
| Rudolph, E.                 | Tanzi            |         | PhD              | Massachusetts General Hospital/Harvard Medical School            | Boston, Massachusetts, USA               |                                                         |                                  |
| Juan, C.                    | Troncoso         |         | MD               | Johns Hopkins University                                         | Baltimore, Maryland, USA                 |                                                         |                                  |
| Debby, W.                   | Tsuang           |         | MD               | University of Washington/VA Puget Sound Health Care System/GRECC | Seattle, Washington, USA                 |                                                         |                                  |
| Otto                        | Valladares       |         | MS               | University of Pennsylvania Perelman School of Medicine           | Philadelphia, Pennsylvania, USA          |                                                         |                                  |
| Vivianna, M.                | Van Deerlin      |         | MD PhD           | University of Pennsylvania Perelman School of Medicine           | Philadelphia, Pennsylvania, USA          |                                                         |                                  |
| Badri, N.                   | Vardarajan       |         | MS               | Columbia University                                              | New York, New York, USA                  |                                                         |                                  |
| Harry, V.                   | Vinters          |         | MD               | University of California Los Angeles                             | Los Angeles, California, USA             |                                                         |                                  |
| Jean Paul                   | Vonsattel        |         | MD               | Columbia University                                              | New York, New York, USA                  |                                                         |                                  |



Supplemental Online Content: Nonauthor Collaborators

\* Indicates required information. Only first name, last name, and suffix will appear in PubMed.

| First Name, Middle Initial* | Last Name*   | Suffix* | Academic Degrees | Institution                                               | Location (city, state/province, country) | Role or Contribution, eg, chair, principal investigator | Subgroup, eg, Steering Committee |
|-----------------------------|--------------|---------|------------------|-----------------------------------------------------------|------------------------------------------|---------------------------------------------------------|----------------------------------|
| Sandra                      | Weintraub    |         | PhD              | Northwestern University<br>Feinberg School of Medicine    | Chicago, Illinois, USA                   |                                                         |                                  |
| Kathleen, A.                | Welsh-Bohmer |         | PhD              | Duke University                                           | Durham, North Carolina, USA              |                                                         |                                  |
| Kirk, C.                    | Wilhelmsen   |         | MD PhD           | University of North Carolina                              | Chapel Hill, North Carolina, USA         |                                                         |                                  |
| Jennifer                    | Williamson   |         | MS               | Columbia University                                       | New York, New York, USA                  |                                                         |                                  |
| Thomas, S.                  | Wingo        |         | MD               | Emory University                                          | Atlanta, Georgia, USA                    |                                                         |                                  |
| Randall, L.                 | Woltjer      |         | MD PhD           | Oregon Health & Science University                        | Portland, Oregon, USA                    |                                                         |                                  |
| Chuang-Kuo                  | Wu           |         | MD PhD           | University of North Carolina<br>Chapel Hill               | Chapel Hill, North Carolina, USA         |                                                         |                                  |
| Steven, G.                  | Younkin      |         | MD PhD           | Mayo Clinic                                               | Jacksonville, Florida, USA               |                                                         |                                  |
| Lei                         | Yu           |         | PhD              | Rush University Medical Center                            | Chicago, Illinois, USA                   |                                                         |                                  |
| Chang-En                    | Yu           |         | PhD              | University of Washington                                  | Seattle, Washington, USA                 |                                                         |                                  |
| Yi                          | Zhao         |         | MS               | University of Pennsylvania<br>Perelman School of Medicine | Philadelphia, Pennsylvania, USA          |                                                         |                                  |
